# Supplementary material for: Floristic–Vegetational Features of Geranium argenteum, an Alpine–Apennine Species at Its Limit of Distribution in the Apennines
Source: MDPI journal article supplement (doi:10.3390/life13122273), 2023-11-28
Supplement: s1 [file s1]

## Supplementary Materials

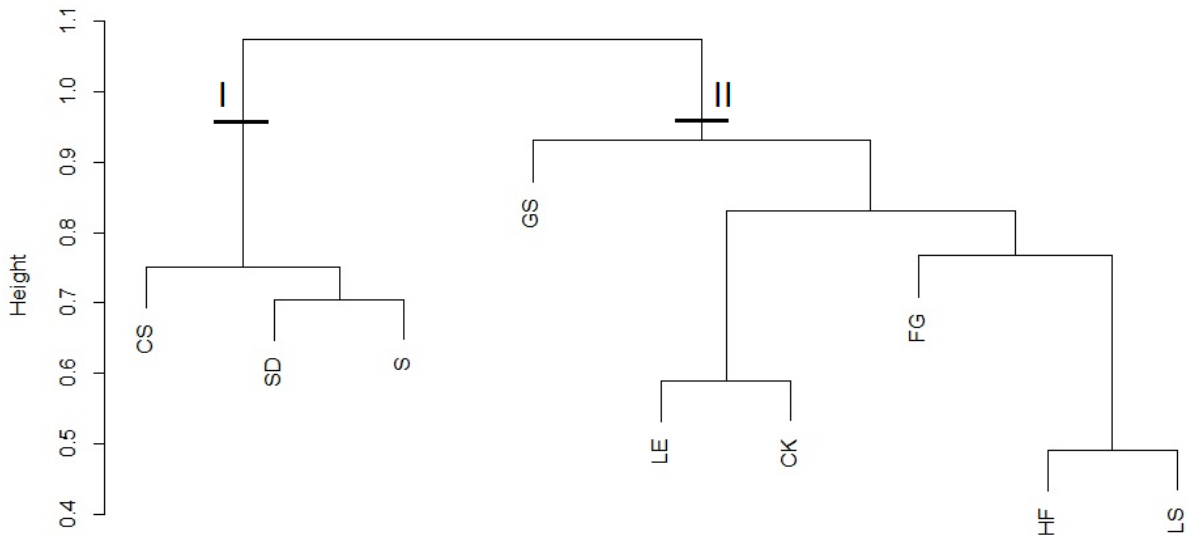

**Figure S1.** Dendrogram obtained from the classification of the relevés groups of the Central Apennines communities, from the high mountain to alpine belts, belonging to the *Carici rupestris-Kobresietea bellardii* and *Festuco-Seslerietea* classes. Cluster I: *Carici rupestris-Kobresietea bellardii* class; Cluster II: *Festuco-Seslerietea* class. Legend of plant associations: (LE) *Leontopodio nivalis-Elynetum myosuroidis* (typus of the *Leontopodio nivalis-Elynion myosuroidis* alliance); (GS) *Galio majellensis-Silenetum acaulis*; (CK) *Caricetum kitaibelianae-rupestris*; (FG) *Festuco italicae-Geranietum argentei* (ass. nova, study area); (LS) *Leontopodio nivalis-Seslerietum juncifoliae*; (HF) *Helianthemo alpestris-Festucetum italicae*; (SD) *Seslerio apenninae-Dryadetum octopetalae*; (S) *Seslerietum apenninae* (typus of the *Seslerion apenninae* alliance); (CS) *Carici humilis-Seslerietum apenninae* (typus of the *Carici humilis-Seslerion apenninae* alliance).

**Table S1.** Synoptic table with frequency values in percent of the plant communities occurring in the alpine and subalpine belts of the central Apennines. Column 1 - *Festuco italicae-Geranietum argentei* ass. nova from Table 1: rels. 1-4 in this paper (study area, Central Apennines); column 2 - *Galio magellensis-Silenetum acaulis* Blasi et al. 2003 from Table 5: rels. 1-8 in Blasi et al. (2003), Gran Sasso mountains (Central Apennines); column 3 - *Helianthemo alpestris-Festucetum italicae* Blasi et al. 2005 from Table VII: rels. 1-13 in Blasi et al. (2005), Majella mountains (Central Apennines); column 4 - *Leontopodio nivalis-Seslerietum juncifoliae* Blasi et al. 2005 from Table VI: rels. 1-13 in Blasi et al. (2005), Majella mountains (Central Apennines); column 5 - *Seslerio apenninae-Dryadetum octopetalae* Biondi et al. 1999 from Tab. 5: rels. 1-13 in Biondi et al. (1999), Gran Sasso mountains (Central Apennines); column 6 - *Leontopodio nivalis-Elynetum myosuroidis* Feoli Chiapella et Feoli 1977 (column 6) from Table 1: rels. 1-8 in Biondi et al. (2000), Gran Sasso mountains (Central Apennines); column 7 - *Caricetum kitaibelianae-rupestris* Biondi et al. 2000 from Table 2: rels. 1-12 in Biondi et al. (2000), Gran Sasso (Central Apennines).

|               |   |   |    |    |    |   |    |
|---------------|---|---|----|----|----|---|----|
| No. of column | 1 | 2 | 3  | 4  | 5  | 6 | 7  |
| No. relevés   | 4 | 8 | 13 | 13 | 13 | 8 | 12 |

***Festuco italicae-Geranietum argentei* ass. nova**

*Festuca violacea* Ser. ex Gaudin subsp. *italica* Foggi, Gr. Rossi et Signorini

*Achillea barrelieri* (Ten.) Sch. Bip. subsp. *barrelieri*

*Gentianella columnae* (Ten.) Holub

*Geranium argenteum* L.

*Potentilla brauneana* Hoppe

|     |    |     |    |    |    |    |
|-----|----|-----|----|----|----|----|
| 100 | 25 | 100 | 77 |    | 75 | 83 |
| 75  | 87 | 15  |    | 15 |    | 33 |
| 100 |    |     | 8  |    |    |    |
| 100 |    |     |    |    |    |    |
| 75  |    |     |    |    |    |    |

***Galio magellensis-Silenetum acaulis* Blasi et al. 2003**

*Galium magellense* Ten.

*Androsace vitaliana* (L.) Lapeyr. subsp. *praetutiana* (Buser ex Sünd) Kress

*Saxifraga aizoides* L.

*Festuca alfrediana* Foggi et Signorini subsp. *ferrariniana* Foggi, Parolo et Gr. Rossi

*Gentiana utriculosa* L.

*Cerastium thomasii* Ten.

|    |     |  |   |  |    |    |
|----|-----|--|---|--|----|----|
| 25 | 87  |  | 8 |  |    | 33 |
|    | 100 |  |   |  | 12 | 33 |
|    | 50  |  |   |  | 12 | 33 |
|    | 75  |  |   |  |    |    |
|    | 37  |  |   |  |    |    |
|    | 100 |  |   |  |    |    |

***Helianthemo alpestris-Festucetum italicae* Blasi et al. 2005**

*Helianthemum oelandicum* (L.) Dum.Cours. subsp. *alpestre* (Jacq.) Ces.

*Sempervivum arachnoideum* L.

*Poa molineri* Balb.

*Trifolium thalii* Vill.

*Leucanthemum trydactylites* (A. Kern. et Huter ex Porta et Rigo) Huter, Porta et Rigo

*Trifolium pratense* L. subsp. *semipurpureum* (Strobl) Pignatti

|     |    |    |    |    |    |
|-----|----|----|----|----|----|
|     | 92 | 85 | 23 | 87 | 83 |
|     | 85 | 85 |    | 12 | 33 |
| 100 | 61 | 61 |    |    |    |
|     | 23 |    |    | 12 |    |
|     | 61 |    |    |    |    |
|     | 23 |    |    |    |    |

***Leontopodio nivalis-Seslerietum juncifoliae* Blasi et al. 2005**

*Sesleria juncifolia* Suffren subsp. *juncifolia*

*Aster alpinus* L. subsp. *alpinus*

*Ranunculus breyninus* Crantz

*Iberis saxatilis* L. subsp. *saxatilis*

*Carex humilis* Leyss.

|     |    |     |     |    |    |
|-----|----|-----|-----|----|----|
| 50  | 54 | 100 | 100 | 50 | 92 |
| 25  | 31 | 85  |     | 50 | 42 |
| 100 | 23 | 85  |     |    | 17 |
|     | 23 | 92  | 15  |    |    |
|     |    | 77  | 31  |    |    |

***Seslerio apenninae-Dryadetum octopetalae* Biondi et al. 1999**

*Dryas octopetala* L. subsp. *octopetala*

*Carex mucronata* All.

*Gentiana dinarica* Beck

*Lomelosia graminifolia* (L.) Greuter et Burdet subsp. *graminifolia*

*Ranunculus thora* L.

|    |     |  |    |
|----|-----|--|----|
| 15 | 100 |  | 33 |
|    | 61  |  |    |
|    | 69  |  |    |
|    | 61  |  |    |
|    | 31  |  |    |

***Leontopodio nivalis-Elynetum myosuroidis* Feoli Chiapella et Feoli 1977**

*Carex myosuroides* Vill.

|   |    |     |    |
|---|----|-----|----|
| 5 | 15 | 100 | 17 |
|---|----|-----|----|

|                                                            |    |    |
|------------------------------------------------------------|----|----|
| Antennaria dioica (L.) Gaetn.                              | 50 | 8  |
| Armeria gracilis Ten. subsp. majellensis (Boiss.) Arrigoni | 50 | 42 |
| Alchemilla colorata Buser                                  | 75 |    |

***Caricetum kitaibelianae-rupestris* Biondi *et al.* 2000**

|                                          |   |    |    |
|------------------------------------------|---|----|----|
| Carex rupestris All.                     | 8 | 50 | 92 |
| Potentilla apennina Ten. subsp. apennina | 8 | 15 | 42 |
| Artemisia eriantha Ten.                  |   |    | 42 |
| Gentiana orbicularis Schur               |   |    | 33 |

***Leontopodio-Elynion, Oxytropido-Elynalia, Carici rupestris-Kobresietea bellardii***

|                                                                             |     |     |     |     |    |     |    |
|-----------------------------------------------------------------------------|-----|-----|-----|-----|----|-----|----|
| Silene acaulis (L.) Jacq. subsp. bryoides (Jord.) Nyman                     | 100 | 100 | 77  | 69  | 8  | 87  | 92 |
| Erigeron epiroticus (Vierh.) Halácsy                                        | 75  | 25  | 61  | 46  |    | 62  | 42 |
| Carex kitaibeliana Degen <i>ex</i> Bech.                                    | 100 |     | 100 | 85  | 85 | 100 | 92 |
| Sabulina verna (L.) Rchb. subsp. verna                                      | 100 |     | 92  | 69  | 31 | 50  | 42 |
| Sedum atratum L.                                                            | 100 | 25  | 31  |     |    | 37  | 58 |
| Leontopodium nivale (Ten.) É. Huet <i>et</i> A. Huet <i>ex</i> Hand.-Mazz.  | 50  |     | 100 | 100 | 31 | 12  |    |
| Potentilla crantzii (Crantz) Beck <i>ex</i> Fritsch subsp. crantzii         | 100 |     | 61  | 38  |    | 75  | 17 |
| Bistorta vivipara (L.) Delarbre                                             |     |     | 8   | 8   | 8  | 100 | 33 |
| Omalotheca diminuta (Braun-Blanq.) Bartolucci <i>et</i> Galasso             | 50  | 5   | 61  |     |    |     |    |
| Pedicularis verticillata L. subsp. verticillata                             |     | 5   |     |     |    | 25  | 33 |
| Oxytropis campestris (L.) DC.                                               |     |     | 77  | 85  |    |     |    |
| Trifolium noricum Wulfen subsp. praetutianum (Guss. <i>ex</i> Savi) Arcang. |     |     |     |     |    | 12  | 8  |
| Carex ericetorum Pollich                                                    |     |     |     |     |    | 62  | 33 |
| Oxytropis neglecta J. Gay <i>ex</i> Ten.                                    |     |     | 8   |     |    |     |    |
| Gentiana nivalis L.                                                         |     |     |     |     |    | 25  |    |
| Saxifraga exarata Vill. subsp. ampullacea (Ten.) D.A. Webb                  |     |     |     |     |    |     | 17 |

***Festuco-Seslerietea***

|                                                                                         |    |    |    |    |    |     |     |
|-----------------------------------------------------------------------------------------|----|----|----|----|----|-----|-----|
| Draba aizoides L. subsp. aizoides                                                       | 75 | 62 | 85 | 85 | 15 | 100 | 75  |
| Edraianthus graminifolius (L.) DC. <i>ex</i> Meisn. subsp. graminifolius                | 75 | 25 | 61 | 92 | 77 | 75  | 100 |
| Androsace villosa L. subsp. villosa                                                     | 50 |    | 85 | 54 | 85 | 25  | 33  |
| Pulsatilla alpina (L.) Delarbre subsp. millefoliata (Bertol.) D.M. Moser                | 50 |    | 85 | 31 | 15 | 12  | 33  |
| Trinia dalechampii (Ten.) Janch.                                                        | 25 |    | 83 | 85 | 8  | 62  | 50  |
| Gentiana verna L. subsp. verna                                                          | 50 |    | 46 | 31 |    | 87  | 33  |
| Pedicularis elegans Ten.                                                                | 25 |    |    | 92 | 8  | 37  | 17  |
| Euphrasia salisburgensis Funck <i>ex</i> Hoppe                                          | 75 |    | 8  | 23 |    | 12  |     |
| Phyteuma orbiculare L.                                                                  |    |    | 15 |    | 8  | 25  | 8   |
| Polygala alpestris Rchb. subsp. alpestris                                               |    |    | 8  | 8  |    |     |     |
| Galium anisophyllum Vill.                                                               |    |    |    |    |    | 37  | 8   |
| Saxifraga caesia L.                                                                     |    |    |    |    | 23 |     | 17  |
| Coeloglossum viride (L.) Hartm.                                                         |    |    |    |    |    | 12  | 17  |
| Thesium parnassi A. DC.                                                                 |    |    |    | 8  | 23 |     |     |
| Alchemilla nitida Buser                                                                 | 50 |    |    |    |    |     |     |
| Paronychia kapela (Hacq.) A. Kern. subsp. kapela                                        | 25 |    |    |    |    |     |     |
| Carduus defloratus L. subsp. carlinifolius (Lam.) Ces.                                  | 25 |    |    |    |    |     |     |
| Bellidiastrum michelii Cass.                                                            | 75 |    |    |    |    |     |     |
| Helianthemum nummularium (L.) Mill. subsp. grandiflorum (Scop.) Schinz <i>et</i> Thell. |    |    |    | 8  |    |     |     |
| Biscutella laevigata L. subsp. laevigata                                                |    |    |    |    |    |     | 8   |
| Carex firma Host                                                                        |    |    |    |    | 8  |     |     |

***Nardetea strictae* and *Juncetea trifidi***

|                                     |     |  |    |   |  |    |  |
|-------------------------------------|-----|--|----|---|--|----|--|
| Plantago atrata Hoppe subsp. atrata | 100 |  | 15 | 8 |  | 37 |  |
|-------------------------------------|-----|--|----|---|--|----|--|

|                                                                                                                     |     |    |     |    |    |    |    |
|---------------------------------------------------------------------------------------------------------------------|-----|----|-----|----|----|----|----|
| Luzula italica Parl.                                                                                                | 25  |    | 8   |    |    | 75 | 8  |
| Campanula scheuchzeri Vill. subsp. scheuchzeri                                                                      |     |    | 31  | 8  |    |    | 17 |
| Pilosella lactucella (Wallr.) P.D. Sell <i>et</i> C. West subsp. nana (Scheele) M. Laínz                            | 25  |    |     |    |    | 37 |    |
| Botrychium lunaria (L.) Sw.                                                                                         | 25  |    |     |    |    | 25 |    |
| Anthoxanthum nipponicum Honda                                                                                       |     |    |     |    |    | 25 | 8  |
| Taraxacum apenninum (Ten.) DC.                                                                                      | 75  |    |     |    |    |    |    |
| Crepis aurea (L.) Cass. subsp. glabrescens (Caruel) Arcang.                                                         | 75  |    |     |    |    |    |    |
| <b><i>Asplenietea trichomanis</i></b>                                                                               |     |    |     |    |    |    |    |
| Saxifraga paniculata Mill.                                                                                          | 75  | 5  | 69  | 85 | 8  | 12 | 33 |
| Saxifraga oppositifolia L. subsp. oppositifolia                                                                     |     | 5  | 8   | 23 | 8  |    | 8  |
| Campanula tanfanii Podlech                                                                                          | 50  |    |     |    | 8  |    |    |
| Asplenium viride Huds.                                                                                              | 50  |    |     |    |    |    |    |
| Cystopteris fragilis (L.) Bernh.                                                                                    | 75  |    |     |    |    |    |    |
| Primula auricula L.                                                                                                 |     |    |     |    |    |    | 33 |
| <b><i>Thlaspietea rotundifolii</i></b>                                                                              |     |    |     |    |    |    |    |
| Saxifraga adscendens L. subsp. adscendens                                                                           | 100 |    | 8   | 31 | 8  | 12 | 8  |
| Ranunculus brevifolius Ten.                                                                                         | 25  | 25 | 23  |    |    |    |    |
| Carum heldreichii Boiss.                                                                                            |     |    |     |    | 38 | 12 | 8  |
| Valeriana saliunca All.                                                                                             |     |    | 8   | 15 |    |    |    |
| Robertia taraxacoides (Loisel.) DC.                                                                                 | 25  | 25 |     |    |    |    |    |
| Noccaea stylosa (Ten.) Rchb.                                                                                        |     | 37 | 8   |    |    |    |    |
| Scorzoneroideis montana (Lam.) Holub                                                                                |     |    | 8   |    | 8  |    |    |
| Leucopoa dimorpha (Guss.) H. Scholz <i>et</i> Foggi                                                                 | 25  |    |     |    |    |    |    |
| Doronicum columnae Ten.                                                                                             | 75  |    |     |    |    |    |    |
| Arabis alpina L. subsp. caucasica (Willd.) Briq.                                                                    | 25  |    |     |    |    |    |    |
| <b>other species</b>                                                                                                |     |    |     |    |    |    |    |
| Anthyllis montana L. subsp. jacquinii (Rchb. f.) Rohlena                                                            | 25  |    |     | 15 | 69 | 12 | 33 |
| Thymus praecox Opiz subsp. polytrichus (A. Kern <i>ex</i> Borbás) Jalas                                             | 75  | 50 | 92  | 46 | 8  |    | 33 |
| Myosotis graui Selvi                                                                                                | 25  | 62 | 23  | 23 |    | 62 | 17 |
| Poa alpina L. subsp. alpina                                                                                         |     | 87 | 46  | 54 | 8  | 87 | 58 |
| Salix retusa L.                                                                                                     |     |    | 15  | 23 | 8  | 12 | 17 |
| Cerastium arvense L. subsp. suffruticosum (L.) Ces.                                                                 | 50  |    | 69  | 61 |    |    | 8  |
| Viola eugeniae Parl. subsp. eugeniae                                                                                |     |    | 31  | 15 |    | 37 | 8  |
| Helictochloa praetutiana (Parl. <i>ex</i> Arcang.) Bartolucci, F. Conti, Peruzzi <i>et</i> Banfi subsp. praetutiana | 75  |    | 83  | 69 | 46 |    |    |
| Anthyllis vulneraria L. subsp. nana (Ten.) Tammaro                                                                  | 50  |    |     |    | 8  | 50 | 58 |
| Cynanchica pyrenaica (L.) P. Caputo <i>et</i> Del Guacchio subsp. neglecta (L.) P. Caputo <i>et</i> Del Guacchio    | 25  |    |     |    | 8  | 12 |    |
| Globularia meridionalis (Podp.) O. Schwarz                                                                          | 75  |    |     |    | 61 |    | 8  |
| Oreojuncus monanthos (Jacq.) Záv. Drábek. <i>et</i> Kirschner                                                       | 50  |    |     | 23 |    | 37 |    |
| Armeria canescens (Host) Ebel                                                                                       |     | 37 | 69  | 46 |    |    |    |
| Pilosella officinarum Vaill.                                                                                        |     |    | 31  | 8  | 8  |    |    |
| Dianthus sylvestris Wulfen subsp. sylvestris                                                                        |     |    |     |    | 8  | 12 | 33 |
| Helianthemum oelandicum (L.) Dum. Cours. subsp. incanum (Willk.) G. López                                           | 25  |    |     |    | 61 |    |    |
| Koeleria australis A. Kern                                                                                          | 75  |    |     |    | 8  |    |    |
| Anthyllis vulneraria L. subsp. pulchella (Vis.) Bornm.                                                              |     |    | 100 | 92 |    |    |    |
| Arenaria grandiflora L. subsp. grandiflora                                                                          |     |    | 8   | 31 |    |    |    |
| Pinus mugo Turra subsp. mugo                                                                                        |     |    | 8   | 8  |    |    |    |
| Cerastium arvense L. subsp. strictum (W.D.J. Koch) Gremli                                                           |     |    |     |    | 8  |    | 33 |
| Juniperus communis L.                                                                                               |     |    |     |    | 15 | 12 |    |
| Armeria gracilis Ten. subsp. gracilis                                                                               | 100 |    |     |    |    |    |    |

|                                                                                                                        |    |   |    |
|------------------------------------------------------------------------------------------------------------------------|----|---|----|
| <i>Carlina acaulis</i> L. subsp. <i>caulescens</i> (Lam.) Schübl. <i>et</i> G. Martens                                 | 25 |   |    |
| <i>Ziziphora granatensis</i> (Boiss. <i>et</i> Reut.) Melnikov subsp. <i>alpina</i> (L.) Bräuchler <i>et</i> Gutermann | 25 |   |    |
| <i>Anthemis cretica</i> L. subsp. <i>columnae</i> (Ten.) Franzén                                                       |    |   | 37 |
| <i>Festuca laevigata</i> Gaudin                                                                                        |    | 8 |    |
| <i>Veronica aphylla</i> L. subsp. <i>aphylla</i>                                                                       |    |   | 33 |
| <i>Astrantia pauciflora</i> Bertol. subsp. <i>tenorei</i> (Mariotti) Bechi <i>et</i> Garbari                           |    |   | 25 |
| <i>Arctostaphylos uva-ursi</i> (L.) Spreng.                                                                            |    |   | 15 |
| <i>Linum capitatum</i> Kit. <i>ex</i> Schult. subsp. <i>serrulatum</i> (Bertol.) Hartvig                               |    |   | 15 |
| <i>Carex macrolepis</i> DC.                                                                                            |    |   | 23 |
| <i>Leontodon hispidus</i> L.                                                                                           |    |   | 31 |
| <i>Brachypodium genuense</i> (DC.) Roem. <i>et</i> Schult.                                                             |    |   | 23 |
| <i>Anthyllis vulneraria</i> L. subsp. <i>weldeniana</i> (Rchb.) Cullen                                                 |    |   | 23 |
| <i>Teucrium montanum</i> L.                                                                                            |    |   | 23 |
| <i>Linum catharticum</i> L. subsp. <i>catharticum</i>                                                                  |    |   | 23 |
| <i>Coronilla minima</i> L.                                                                                             |    |   | 15 |
| <i>Bromopsis erecta</i> (Huds.) Fourr.                                                                                 |    |   | 15 |
| <i>Hieracium bifidum</i> Kit. <i>ex</i> Hornem.                                                                        |    |   | 8  |
| <i>Lotus corniculatus</i> L.                                                                                           |    |   | 8  |

**Table S2.** Chorological spectrum of the species in Table 1. Legend: (n) percentage of species; (f) percentage frequency; (c) species cover percentage

| Chorological type              | n %  | f %  | c %  |
|--------------------------------|------|------|------|
| Endemic Italian and subendemic | 25.0 | 25.2 | 71.3 |
| Boreal                         | 15.0 | 16.8 | 11.4 |
| South European orophytes       | 38.3 | 38.5 | 13.6 |
| European Orophytes             | 5.0  | 6.3  | 1.2  |
| Mediterranean                  | 11.7 | 9.8  | 1.8  |
| Eurasian                       | 1.7  | 0.7  | 0.1  |
| Cosmopolitan                   | 3.3  | 2.7  | 0.5  |

**Table S3.** Weight of species shown in the PCA of Figure 5 with respect to the three main components identified (axes PC1, PC2 and PC3) and the relative % of variance explained by each one. The full name of the abbreviated species are reported in Table 4

|             | Species<br>weight PC1<br>(%) | Variance explain<br>by species PC1<br>(%) | Species<br>weight PC2<br>(%) | Variance explain<br>by species PC2<br>(%) | Species<br>weight PC3<br>(%) | Variance explain<br>by species PC3<br>(%) |
|-------------|------------------------------|-------------------------------------------|------------------------------|-------------------------------------------|------------------------------|-------------------------------------------|
| Sal.retu    | 10.08                        | 1.84                                      | 0.11                         | 0.01                                      | 4.86                         | 0.49                                      |
| Bis.viv     | 9.80                         | 1.79                                      | 0.05                         | 0.01                                      | 0.01                         | 0.00                                      |
| Tri.pal     | 7.13                         | 1.30                                      | 0.08                         | 0.01                                      | 3.21                         | 0.32                                      |
| Par.pal     | 7.00                         | 1.28                                      | 0.09                         | 0.01                                      | 3.13                         | 0.32                                      |
| Car.rup     | 4.65                         | 0.85                                      | 30.02                        | 3.38                                      | 2.19                         | 0.22                                      |
| Hel.oel.inc | 2.89                         | 0.53                                      | 0.09                         | 0.01                                      | 3.30                         | 0.33                                      |
| Sax.pan     | 2.76                         | 0.50                                      | 0.36                         | 0.04                                      | 0.61                         | 0.06                                      |
| Thy.pra     | 2.52                         | 0.46                                      | 0.68                         | 0.08                                      | 0.46                         | 0.05                                      |
| Ger.arg     | 2.46                         | 0.45                                      | 0.64                         | 0.07                                      | 0.43                         | 0.04                                      |
| Gal.ani     | 2.45                         | 0.45                                      | 0.02                         | 0.00                                      | 0.07                         | 0.01                                      |
| Gen.ani     | 2.43                         | 0.44                                      | 0.11                         | 0.01                                      | 0.53                         | 0.05                                      |
| Ast.alp     | 2.41                         | 0.44                                      | 3.65                         | 0.41                                      | 1.11                         | 0.11                                      |
| Fes.lae     | 2.12                         | 0.39                                      | 4.30                         | 0.48                                      | 1.05                         | 0.11                                      |
| Ant.nip     | 2.00                         | 0.37                                      | 0.12                         | 0.01                                      | 0.77                         | 0.08                                      |
| Eup.sal     | 1.68                         | 0.31                                      | 0.07                         | 0.01                                      | 1.26                         | 0.13                                      |
| Sol.alp     | 1.67                         | 0.30                                      | 0.21                         | 0.02                                      | 1.98                         | 0.20                                      |
| Ses.jun     | 1.64                         | 0.30                                      | 2.95                         | 0.33                                      | 0.19                         | 0.02                                      |
| Alc.tra     | 1.32                         | 0.24                                      | 8.12                         | 0.91                                      | 1.71                         | 0.17                                      |
| Ach.cla     | 1.28                         | 0.23                                      | 0.01                         | 0.00                                      | 0.01                         | 0.00                                      |
| Ped.ver     | 1.25                         | 0.23                                      | 0.02                         | 0.00                                      | 0.12                         | 0.01                                      |
| Cer.arv     | 1.22                         | 0.22                                      | 2.22                         | 0.25                                      | 0.06                         | 0.01                                      |
| Bra.gen     | 1.20                         | 0.22                                      | 2.48                         | 0.28                                      | 0.45                         | 0.05                                      |
| Pot.cra     | 1.16                         | 0.21                                      | 0.09                         | 0.01                                      | 0.87                         | 0.09                                      |
| Poa.alp     | 1.15                         | 0.21                                      | 2.62                         | 0.29                                      | 2.98                         | 0.30                                      |
| Fes.nit     | 1.11                         | 0.20                                      | 0.01                         | 0.00                                      | 0.60                         | 0.06                                      |
| Agr.rup     | 1.09                         | 0.20                                      | 0.01                         | 0.00                                      | 0.82                         | 0.08                                      |
| Ach.alp     | 0.92                         | 0.17                                      | 1.90                         | 0.21                                      | 0.35                         | 0.04                                      |
| Alc.cin     | 0.88                         | 0.16                                      | 1.80                         | 0.20                                      | 0.44                         | 0.04                                      |
| Fes.ric     | 0.83                         | 0.15                                      | 2.96                         | 0.33                                      | 0.93                         | 0.09                                      |
| Bel.mic     | 0.77                         | 0.14                                      | 2.03                         | 0.23                                      | 0.48                         | 0.05                                      |
| Fes.vio     | 0.33                         | 0.06                                      | 0.25                         | 0.03                                      | 1.39                         | 0.14                                      |
| Alc.flu     | 0.17                         | 0.03                                      | 5.22                         | 0.59                                      | 5.47                         | 0.55                                      |
| Sab.ver     | 0.11                         | 0.02                                      | 0.03                         | 0.00                                      | 1.94                         | 0.20                                      |
| Sil.aca     | 0.08                         | 0.01                                      | 0.18                         | 0.02                                      | 2.66                         | 0.27                                      |
| Dry.oct     | 0.06                         | 0.01                                      | 0.19                         | 0.02                                      | 2.00                         | 0.20                                      |
| Ses.cae     | 0.03                         | 0.01                                      | 0.34                         | 0.04                                      | 4.05                         | 0.41                                      |
| Car.myo     | 0.02                         | 0.00                                      | 0.57                         | 0.06                                      | 4.74                         | 0.48                                      |
| Ses.sph     | 0.02                         | 0.00                                      | 0.25                         | 0.03                                      | 1.96                         | 0.20                                      |
| Cha.alp     | 0.02                         | 0.00                                      | 0.28                         | 0.03                                      | 2.36                         | 0.24                                      |
| Sax.cru     | 0.01                         | 0.00                                      | 0.20                         | 0.02                                      | 2.64                         | 0.27                                      |
| Dia.ste     | 0.01                         | 0.00                                      | 0.17                         | 0.02                                      | 1.50                         | 0.15                                      |
